# Supplementary material for: Sustained and Targeted Delivery of Self-Assembled Doxorubicin Nonapeptides Using pH-Responsive Hydrogels for Osteosarcoma Chemotherapy
Source: MDPI journal article supplement (doi:10.3390/pharmaceutics15020668), 2023-02-16
Supplement: s1 [file s1]

**Table S1.** Mass spectrometry confirmation of P1 peptide.

| Peptide | Molecular weight | Theoretical value           | Measured value              |
|---------|------------------|-----------------------------|-----------------------------|
| P1      | 1072.26          | [M+H] <sup>+</sup> 1073.26  | [M+H] <sup>+</sup> 1073.21  |
|         |                  | [M+2H] <sup>2+</sup> 537.13 | [M+2H] <sup>2+</sup> 537.33 |

**Table S2.** Summary of phase behavior of peptides at different pH values.

| peptides | pH  |     |     |
|----------|-----|-----|-----|
|          | 5.8 | 7.4 | 9.2 |
| P0       | SG  | UG  | UG  |
| P1       | FL  | SG  | SG  |
| P2       | SG  | UG  | UG  |

FL: Fluid liquid; SG: Stable gel; UG: Unstable gel.

**Table S3.** Summary of phase behavior of peptides in different concentration.

| Peptides | Concentration (mg/mL) |             |            |                |
|----------|-----------------------|-------------|------------|----------------|
|          | 5                     | 10          | 15         | 20             |
| P1       | VL                    | SG (17 min) | SG (3 min) | SG (instantly) |
| P2       | VL                    | UG (3 min)  | UG (3 min) | UG (3 min)     |

VL: Viscous liquid; SG: Stable gel; UG: Unstable gel.

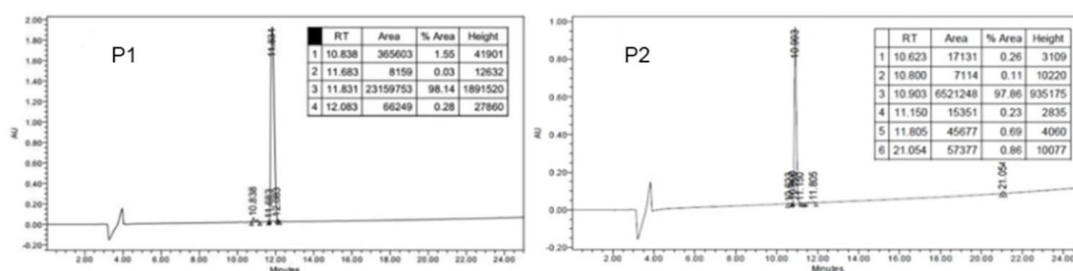

**Figure S1.** The UPLC chromatograms and peak data of designed nonapeptides.

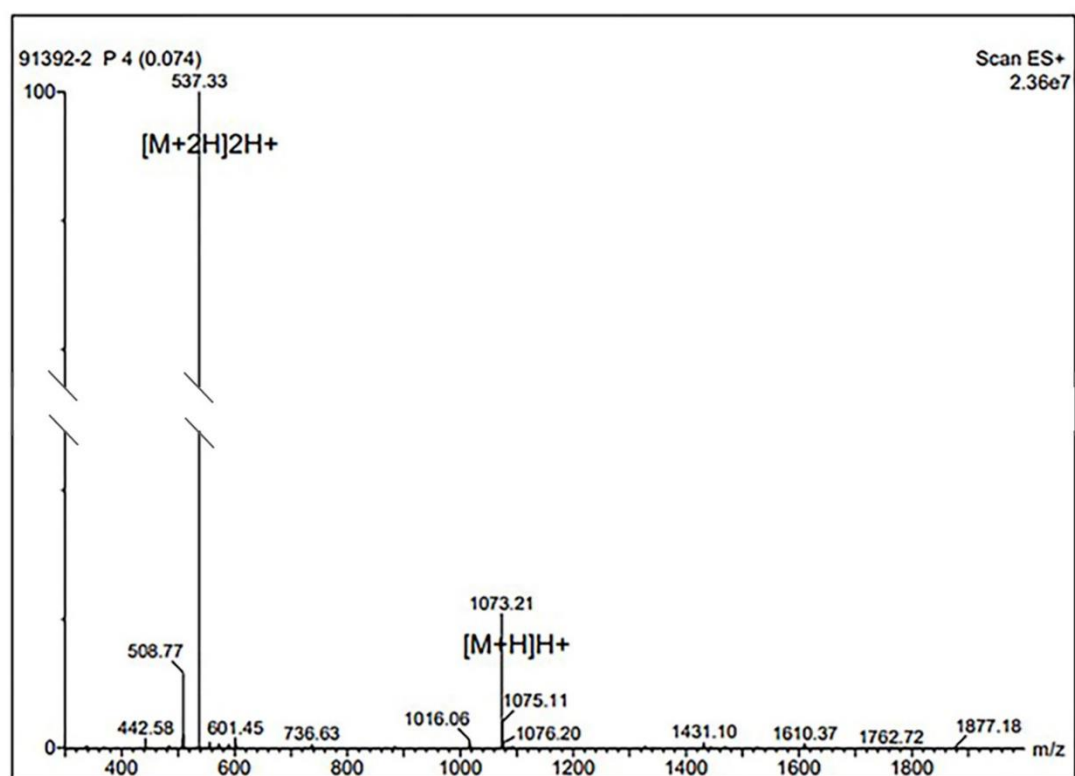

Figure S2. The mass spectrum of P1 peptide.

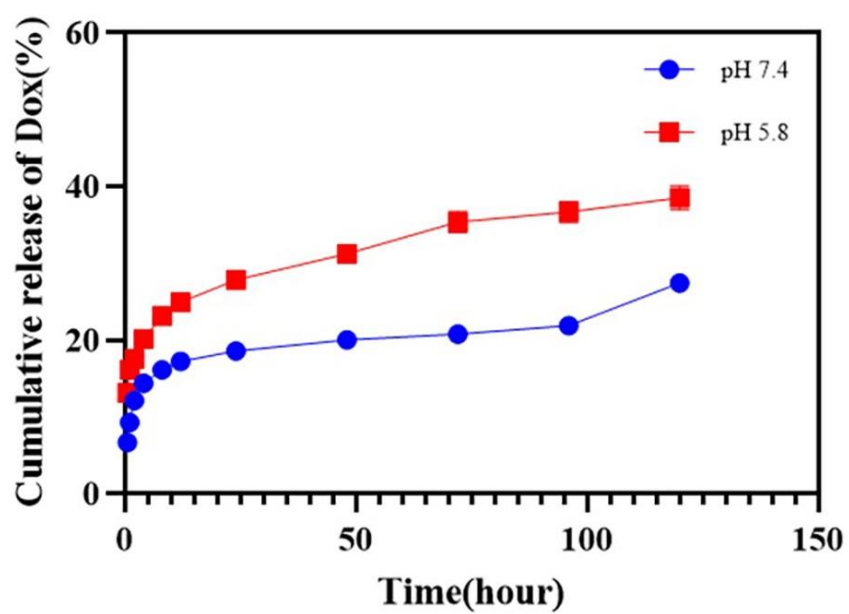

Figure S3. Cumulative release of Dox from DOX-P2 hydrogel.

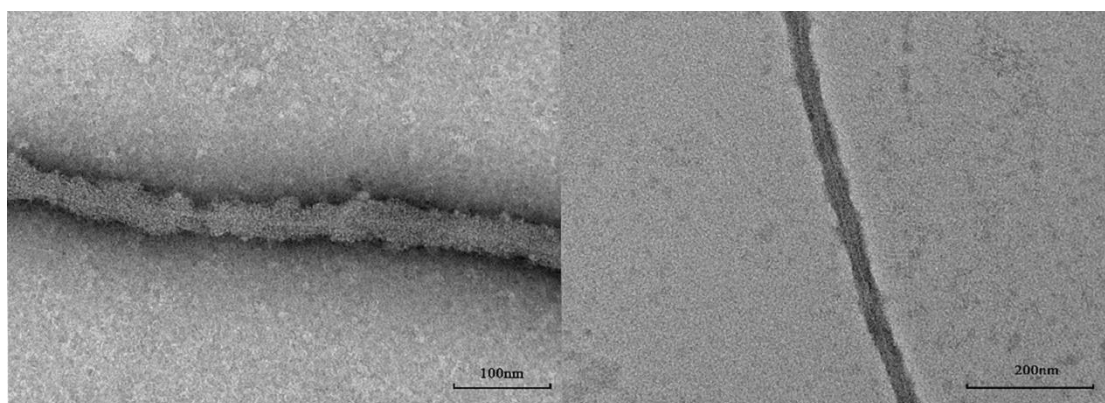

**Figure S4.** Transmission electron microscopy of drug loaded nanofiber.
